# Supplementary material for: Parkin is activated by PINK1-dependent phosphorylation of ubiquitin at Ser65
Source: PubMed Central journal article supplement (PMC4000136; doi:10.1042/bj20140334), 2014-04-25
Supplement: bj4600127add.pdf [file bj4600127add.pdf]

## SUPPLEMENTARY ONLINE DATA

Parkin is activated by PINK1-dependent phosphorylation of ubiquitin at Ser<sup>65</sup>

Agne KAZLAUSKAITE\*<sup>1</sup>, Chandana KONDAPALLI\*, Robert GOURLAY\*, David G. CAMPBELL\*, Maria Stella RITORTO\*, Kay HOFMANN†, Dario R. ALESSI\*, Axel KNEBEL\*, Matthias TROST\* and Miratul M. K. MUQIT\*‡<sup>1</sup>

\*MRC Protein Phosphorylation and Ubiquitylation Unit, University of Dundee, Dundee, Scotland, U.K.

†Institute for Genetics, University of Cologne, Cologne, Germany

‡College of Medicine, Dentistry & Nursing, University of Dundee, Dundee, Scotland, U.K.

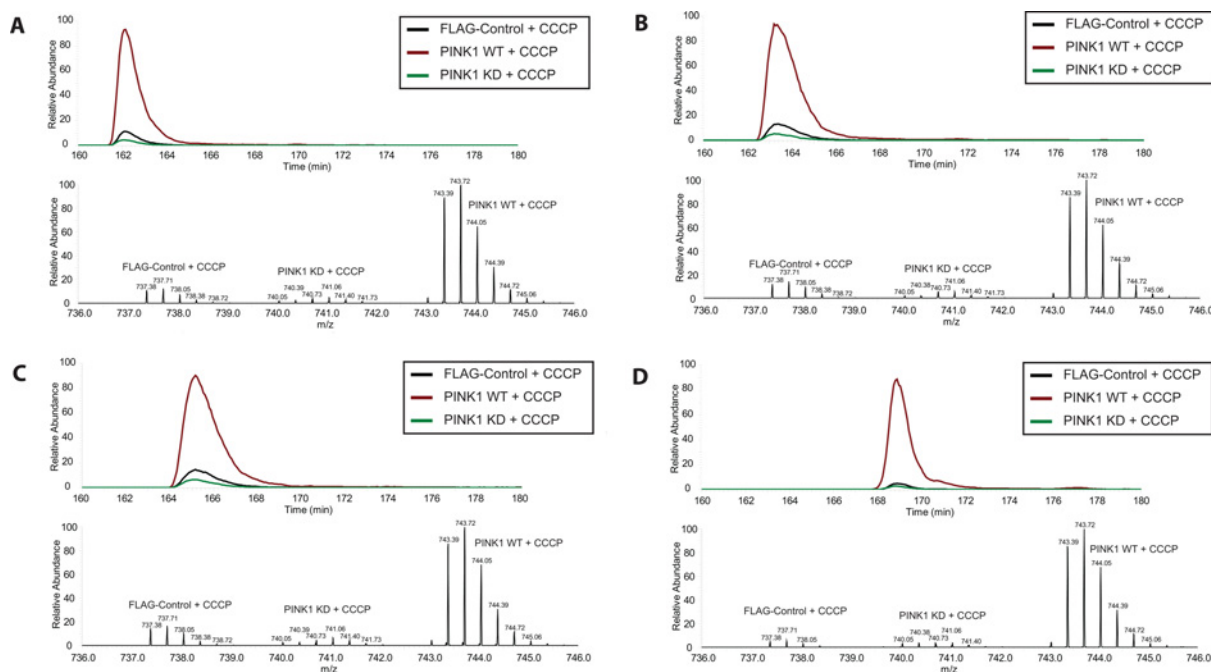

**Figure S1** Reproducible phosphorylation of ubiquitin upon PINK1 stimulation by CCCP *in vivo*

Flp-In T-Rex HEK-293 cells stably expressing FLAG-empty, wild-type PINK1-FLAG or kinase-inactive PINK1-FLAG were grown in light, heavy and medium SILAC media respectively. Cells in each condition were stimulated with 10  $\mu$ M CCCP for 3 h. Subsequently, membrane fractions were enriched by ultracentrifugation and solubilized in 1% RapiGest. Lysates from each of the three conditions were mixed at 1:1:1 and digested with trypsin before phosphopeptide enrichment by HILIC and TiO<sub>2</sub>, and analysis by MS. Data analysis was performed using MaxQuant. (A–D) Extracted ion chromatograms representing the ubiquitin Ser<sup>65</sup> phosphopeptide TLSDYNIQKpSTLHLVLR in the three SILAC-labelled conditions over all four biological replicates. There is a ~14-fold increase in abundance in cells transfected in the wild-type PINK1-FLAG compared with the kinase-inactive PINK1-FLAG.

<sup>1</sup> Correspondence may be addressed to either of these authors (a.kazlauskait@dundee.ac.uk or m.muqit@dundee.ac.uk).

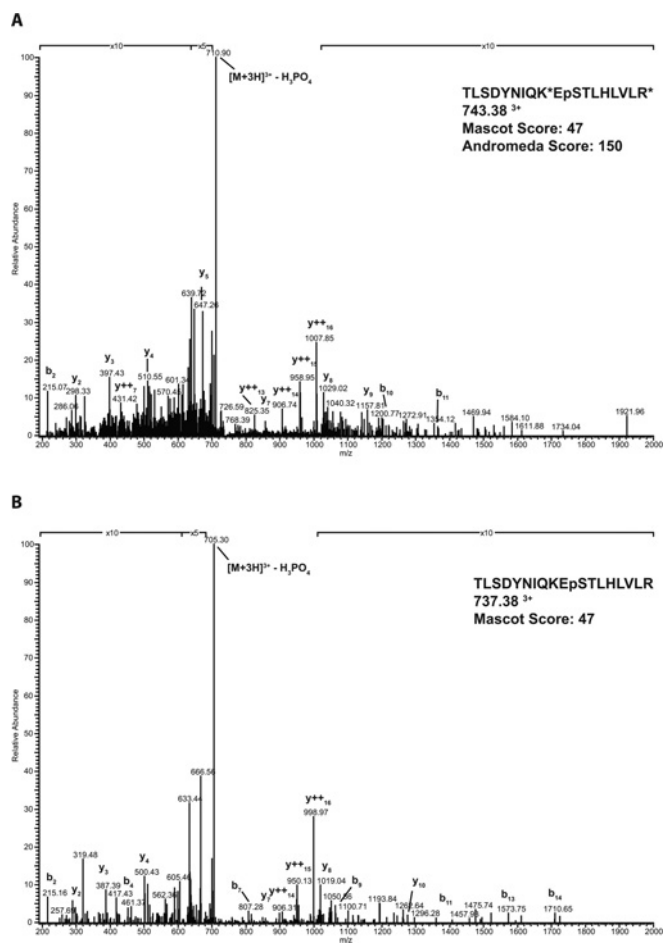

**Figure S2 MS/MS fragmentation spectra of the phosphorylated ubiquitin peptide TLSDYNIQKEpSTLHLVLR**

(A) MS/MS spectrum of the heavy (R10K)-labelled peptide TLSDYNIQKEpSTLHLVLR identified in wild-type PINK1-FLAG-transfected cells. (B) Virtually identical MS/MS spectrum of TLSDYNIQKEpSTLHLVLR from a digest of ubiquitin *in vitro* phosphorylated by TcPINK1. Note that the doubly charged ion [1105.5650]<sup>2+</sup> of the same peptide was also positively identified in both experiments with Andromeda and Mascot Scores of 202 and 54 respectively.

Received 12 March 2014/24 March 2014; accepted 25 March 2014  
Published as BJ Immediate Publication 25 March 2014, doi:10.1042/BJ20140334
